# Supplementary material
Source: PubMed Central journal article supplement (PMC2836039)

**SUPPLEMENTAL FIGURE 1.** GLUT4 Staining of wild type and CIP4 null adipocytes. SV40 Large T antigen transformed preadipocytes were differentiated into adipocytes. The adipocytes were stained with a mouse monoclonal antibody against GLUT4 (Cell Signaling) and images were captured using a Nikon C1Si spectral laser scanning confocal microscope.

CIP4 +/+

CIP4 -/-

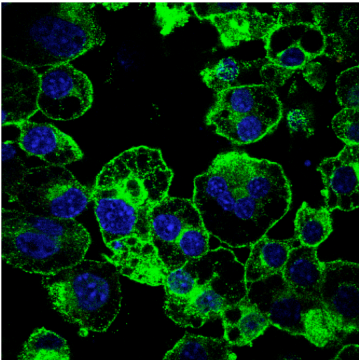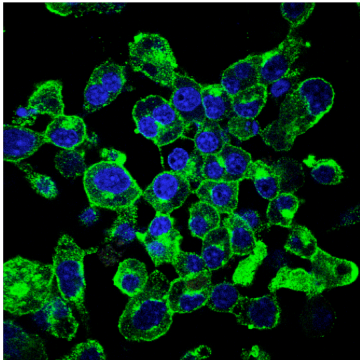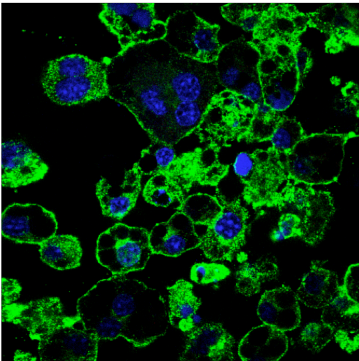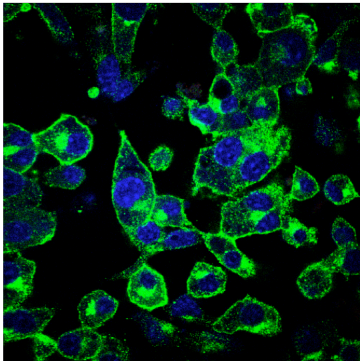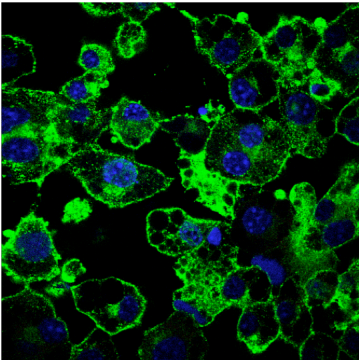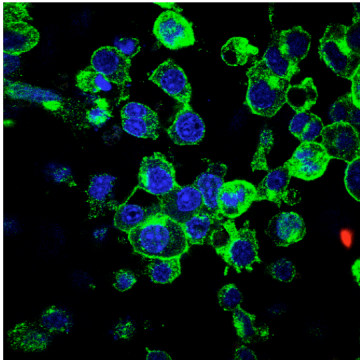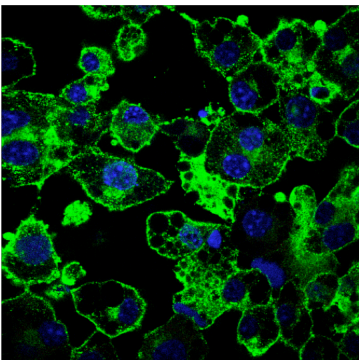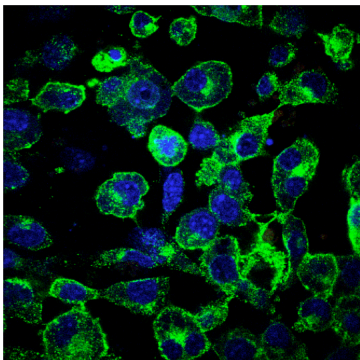

Supplement: supp_M109.041038_jbc.M109.041038-1.pdf [file supp_M109.041038_jbc.M109.041038-1.pdf]
